# Supplementary material
Source: publisher figshare collection journal article supplement (https://geolsoc.figshare.com/ndownloader/files/25726961)
Supplement: Supplementary file 1 [file 25726961]

Sample/ Identifier	Corrected isotopic ratios							Apparent ages (Ma)						U, Th and Pb content (ppm)							Concord.	Concordia
	207Pb	±2SE	206Pb	±2SE	207Pb	±2SE	Rho	207Pb	±2SE	206Pb	±2SE	207Pb	±2SE	Approx U	±2SE	Approx Th	±2SE	Approx Pb	±2SE	Th/U		Age	±2SE
	235U	(abs.)	238U	(abs.)	206Pb	(abs.)	6/8 vs.7/5	235U	(Ma)	238U	(Ma)	206Pb	(Ma)	(ppm)	(abs.)	(ppm)	(abs.)	(ppm)	(abs.)	ratio	(%)	(Ma)	(Ma)
Sample C5-18 (n=59): Retrogressed eclogite (50.2326717N, 17.0756053E)
C518_01C	0.719	0.021	0.0887	0.0014	0.059	0.0018	0.24938	550.1	12.4	547.84	8.29	566.1	66.4	171.6	9.7	81.5	4.5	20.9	1.1	0.47	99.6	548.4	7.61
C518_01R	0.726	0.016	0.0886	0.0016	0.0597	0.0013	0.20947	554.2	9.41	547.25	9.47	591.7	47.2	745.1	9.4	67.5	1.4	17.74	0.78	0.09	98.7	550.74	7.36
C518_02R*	0.895	0.082	0.0906	0.005	0.0729	0.0076	0.054441	649.1	43.9	559.1	29.6	1010	211	113	16	27.1	3.1	7.9	1.3	0.24	86.1	584.2	25.7
C518_03C	0.697	0.023	0.0838	0.0015	0.0604	0.002	0.20719	537	13.8	518.76	8.92	617	71.5	289	12	185.4	8.4	42.7	2	0.64	96.6	523.19	8.17
C518_04C*	1	0.039	0.0941	0.0021	0.078	0.0034	0.14582	703.8	19.8	579.7	12.4	1146	86.6	284	14	116	10	40.9	2.2	0.41	82.4	606.3	11.5
C518_04R*	0.793	0.016	0.0869	0.0015	0.0665	0.0018	-0.027636	592.87	9.06	537.18	8.9	821.2	56.5	865	82	57.1	5.8	23.9	1.6	0.07	90.6	563.87	6.37
C518_05C	0.74	0.033	0.0897	0.0022	0.0601	0.0031	-0.12173	562.4	19.3	553.8	13	606	112	270.5	6.6	41.2	1.9	11.18	0.97	0.15	98.5	556.6	10.2
C518_05R	0.715	0.016	0.089	0.0015	0.0583	0.0014	0.22339	547.71	9.47	549.62	8.88	540.1	52.5	893	69	77.6	2.2	19.01	0.71	0.09	100.3	548.74	7.16
C518_06C	0.758	0.035	0.0931	0.0021	0.0584	0.0022	0.41594	572.9	20.2	573.8	12.4	543.8	82.3	395	21	42.8	4.4	11.5	0.91	0.11	100.2	573.7	12.1
C518_06R*	0.6345	0.0083	0.07689	0.0011	0.05992	0.00079	0.40864	498.9	5.16	477.53	6.58	599.7	28.5	1990	140	37.6	2.8	12.29	0.86	0.02	95.7	492.34	4.81
C518_07C	0.732	0.019	0.0891	0.0015	0.0596	0.0016	0.18258	557.7	11.1	550.21	8.88	588.1	58.2	237	11	88.8	5.3	23.9	1.4	0.37	98.7	552.93	7.55
C518_07R	0.719	0.02	0.0889	0.0016	0.0583	0.0016	0.27366	550.1	11.8	549.03	9.47	540.1	60	213.7	9.5	85	4.1	22.42	0.97	0.40	99.8	549.4	8.31
C518_08C	0.697	0.013	0.0864	0.0013	0.0583	0.0011	0.40889	537	7.78	534.21	7.71	540.1	41.3	924	51	128	12	32	2.7	0.14	99.5	535.58	6.51
C518_09C	0.736	0.038	0.0883	0.002	0.0606	0.0034	0.069638	560.1	22.2	545.5	11.8	624	121	253	38	158	35	34.3	7.1	0.62	97.4	548.4	10.8
C518_10C*	0.737	0.023	0.0845	0.0016	0.0628	0.0022	0.17653	560.7	13.4	522.93	9.51	700.5	74.6	348	32	91	8.5	22	2	0.26	93.3	533.82	8.47
C518_10R*	0.726	0.037	0.0812	0.0025	0.0658	0.0041	0.025162	554.2	21.8	503.3	14.9	799	131	159	12	45.9	3.9	11.22	0.94	0.29	90.8	518.7	12.6
C518_11C	0.76	0.037	0.0934	0.0024	0.059	0.0028	0.34656	574	21.3	575.6	14.1	566	103	425.6	9.8	283	11	64.8	2.7	0.66	100.3	575.3	13.4
C518_12*	0.786	0.047	0.0806	0.0023	0.0707	0.004	0.32988	588.9	26.7	499.7	13.7	948	116	157.8	8.6	13.2	1.7	5.54	0.69	0.08	84.9	506.6	13.7
C518_13C	0.702	0.034	0.086	0.0019	0.0592	0.003	0.1084	540	20.3	531.8	11.3	573	110	249	8.4	106.1	7.6	24.9	1.8	0.43	98.5	533.5	10.3
C518_14*	1.94	0.59	0.073	0.011	0.211	0.082	-0.17014	1095	204	454.2	66.1	2913	629	23.4	8.7	0.15	0.12	3.8	1.3	0.01	41.5	503.4	62.4
C518_15C	0.695	0.027	0.0854	0.002	0.0579	0.002	0.26218	535.8	16.2	528.3	11.9	525	75.7	295	23	126	11	26.2	2.6	0.43	98.6	530.5	10.7
C518_15R	0.693	0.019	0.085	0.0014	0.0585	0.0017	0.14721	534.6	11.4	525.9	8.32	547.6	63.5	782	19	52.5	1.6	12.19	0.7	0.07	98.4	528.69	7.19
C518_16C*	0.805	0.032	0.0899	0.0022	0.0645	0.0028	0.12633	599.6	18	554.9	13	757.1	91.6	239	18	64	11	16	2.4	0.27	92.5	568.8	11.3
C518_17*	0.722	0.017	0.085	0.0015	0.061	0.0013	0.45311	551.8	10	525.9	8.91	638.3	45.8	923	24	193.3	5.4	44.6	1.7	0.21	95.3	535.77	8.1
C518_18*	0.74	0.027	0.0861	0.0018	0.062	0.0025	0.03675	562.4	15.8	532.4	10.7	673.1	86.2	205	8.9	117.4	3.8	25.5	1.1	0.57	94.7	541.45	9.06
C518_19*	0.76	0.031	0.0856	0.0021	0.064	0.0027	0.2304	574	17.9	529.5	12.5	740.7	89.2	409.3	7.2	105	13	25.3	2.4	0.26	92.2	541.3	11.4
C518_20C	0.712	0.029	0.089	0.002	0.0577	0.0023	0.20077	545.9	17.2	549.6	11.8	517.4	87.5	306	12	96.8	3.1	21.5	1.1	0.32	100.7	548.6	10.6
C518_21C*	0.67	0.031	0.0801	0.0021	0.0603	0.0026	0.39581	520.7	18.8	496.7	12.5	613.4	93.1	325	21	49.6	1.3	11.42	0.75	0.15	95.4	501.2	12.1
C518_22	0.804	0.026	0.096	0.002	0.0603	0.0018	0.37764	599.1	14.6	590.9	11.8	613.4	64.5	275	25	103	10	28.9	2.5	0.37	98.6	593.6	10.7
C518_23C*	3.57	0.055	0.2475	0.0046	0.1042	0.0015	0.70198	1542.9	12.2	1425.6	23.8	1699.4	26.5	602	12	55.9	1.3	40.5	0.97	0.09	83.9	1563.7	11.8
C518_23R	0.697	0.026	0.0857	0.002	0.0591	0.0025	0.083094	537	15.6	530.1	11.9	569.8	92.1	373	8.4	58.8	1.4	13.58	0.77	0.16	98.7	532.52	9.83
C518_24C*	0.783	0.029	0.0896	0.0024	0.0635	0.0025	0.26646	587.2	16.5	553.2	14.2	724.1	83.5	238	6.1	120.1	2.9	28.1	1.2	0.50	94.2	566.3	12.2
C518_24R	0.729	0.027	0.0872	0.0023	0.0619	0.0033	0.18144	556	15.9	539	13.6	670	114	251.1	5.5	57.1	2.5	16.5	1.5	0.23	96.9	545.8	11.3
C518_25C*	0.987	0.054	0.0872	0.0018	0.0816	0.0039	0.45356	697.2	27.6	539	10.7	1235.1	93.7	436	50	60.5	3.4	27.5	1.5	0.14	77.3	530.2	10.7
C518_26C	0.725	0.03	0.0881	0.0021	0.0599	0.0026	0.14755	553.6	17.7	544.3	12.4	599	94	451	14	86.8	4.7	21.7	1.8	0.19	98.3	547.1	10.9
C518_27C*	2.577	0.043	0.1948	0.0032	0.0959	0.0013	0.59623	1294.1	12.2	1147.3	17.3	1545	25.5	693	27	340	29	192	15	0.49	74.3	1271.6	12.9
C518_28C	0.729	0.02	0.0887	0.0016	0.06	0.0017	0.19902	556	11.7	547.84	9.47	602.6	61.3	443.5	7.9	269	10	58.1	2.6	0.61	98.5	550.82	8.07
C518_29C	0.716	0.025	0.0891	0.0016	0.0583	0.002	0.26147	548.3	14.8	550.21	9.47	540.1	75	147.1	7.2	60.9	2.2	16.1	0.66	0.41	100.3	549.78	8.81
C518_29R	0.726	0.024	0.0882	0.0018	0.0598	0.0021	0.22583	554.2	14.1	544.9	10.7	595.4	76.1	117.6	6.5	58.3	3.1	14.63	0.87	0.50	98.3	547.89	9.4
C518_30C	0.802	0.021	0.0967	0.0018	0.0604	0.0014	0.50323	598	11.8	595	10.6	617	50	287	25	116.4	9.2	37.7	3	0.41	99.5	596.17	9.65
C518_31C*	0.615	0.025	0.0644	0.0017	0.0705	0.0032	0.014047	486.7	15.7	402.3	10.3	942	93	568	47	72.6	7.4	15.9	1.7	0.13	82.7	425.76	8.86
C518_32C	0.719	0.019	0.0887	0.0016	0.0596	0.0017	0.18642	550.1	11.2	547.84	9.47	588.1	61.9	431	25	235	19	51.8	4.2	0.55	99.6	548.73	7.88
C518_33C	0.724	0.032	0.0881	0.0016	0.0601	0.0025	0.37052	553	18.8	544.29	9.48	606.2	90	224	10	113.7	8.4	23.5	1.8	0.51	98.4	544.93	9.4
C518_34C	0.676	0.02	0.0839	0.0015	0.0589	0.0019	0.14305	524.4	12.1	519.36	8.92	562.4	70.3	130.4	5.2	73.6	3.1	17.95	0.74	0.56	99.0	520.99	7.66
C518_34R	0.807	0.03	0.0955	0.0024	0.0617	0.0022	0.31472	600.8	16.9	588	14.1	662.8	76.4	279	25	66.7	1.5	17.8	0.78	0.24	97.9	592.7	12.4
C518_35R	0.703	0.023	0.0867	0.0015	0.0593	0.0018	0.27313	540.6	13.7	535.99	8.9	577.2	66	250	12	66.9	2.1	14.73	0.64	0.27	99.1	537.03	8.3
C518_36R*	0.768	0.024	0.0847	0.0014	0.0664	0.0021	0.15461	578.6	13.8	524.12	8.32	818.1	66.1	159.1	4	74.8	2.1	19.24	0.76	0.47	90.6	535.85	7.68
C518_37C	0.696	0.022	0.0865	0.0016	0.0593	0.0019	0.25835	536.4	13.2	534.8	9.49	577.2	69.6	180.9	7	82.2	3.2	19	0.86	0.45	99.7	535.27	8.57
C518_37R*	8.4	1.2	0.156	0.011	0.367	0.034	0.62008	2275	130	934.5	61.3	3778	140	335	14	153.2	5.8	394	47	0.46	41.1	724.1	53.7
C518_38C*	1.5	0.13	0.0922	0.0024	0.1134	0.0087	0.18823	930.4	52.8	568.5	14.2	1854	139	142	13	69.7	9.9	33.1	4.4	0.49	61.1	568.5	14.3
C518_38R	0.725	0.023	0.0893	0.0016	0.0593	0.0018	0.27997	553.6	13.5	551.4	9.47	577.2	66	143.3	7.3	64.7	3.5	17.5	1	0.45	99.6	551.99	8.68
C518_39C	0.727	0.021	0.0889	0.0015	0.0599	0.0019	0.04617	554.8	12.3	549.03	8.88	599	68.7	150.7	9.1	73.3	4.8	18.1	1.1	0.49	99.0	550.94	7.38
C518_40C	0.704	0.022	0.0864	0.0016	0.0594	0.002	0.16676	541.2	13.1	534.21	9.49	580.8	73.1	133.3	5.5	63.2	2.7	16.53	0.79	0.47	98.7	536.39	8.28
C518_40R	0.719	0.018	0.0887	0.0014	0.0591	0.0015	0.15089	550.1	10.6	547.84	8.29	569.8	55.2	226.4	4.3	35.3	2.2	8.58	0.54	0.16	99.6	548.64	7
C518_41C	0.725	0.025	0.089	0.0019	0.0594	0.002	0.3391	553.6	14.7	549.6	11.2	580.8	73.1	356.2	5.1	229.2	6.1	51.3	1.9	0.64	99.3	550.8	10.3
C518_41R	0.708	0.015	0.0871	0.0016	0.0593	0.0013	0.29629	543.56	8.92	538.36	9.49	577.2	47.6	576	10	63.1	1.6	15.26	0.61	0.11	99.0	541.18	7.41
C518_42C*	0.758	0.032	0.0871	0.0022	0.0636	0.002	0.76063	572.9	18.5	538.4	13	727.4	66.7	680	110	146	18	37.1	4.1	0.21	94.0	533.8	13.2
C518_43C*	0.906	0.037	0.0876	0.0019	0.0757	0.0033	0.059877	654.9	19.7	541.3	11.3	1086.2	87.4	97	4.8	34.2	1.5	11.48	0.57	0.35	82.7	564.7	10.3
C518_43R*	0.737	0.043	0.0816	0.0025	0.0657	0.0038	0.23688	560.7	25.1	505.7	14.9	796	121	306	17	40.4	3.3	10.87	0.85	0.13	90.2	515.6	14.2
C=analysis of grain core; R=analysis from grain rim; * denotes analyses that failed 2? concordance test
Sample C7-18 (n=52): Mylonitic augen gneiss (50.2585961N, 17.0708578E)
C718_01*	5.972	0.073	0.3419	0.0047	0.1251	0.0014	0.53298	1971.8	10.6	1895.8	22.6	2029.4	19.8	769	39	398	20	339	14	0.52	93.4	1974.7	10.7
C718_02C*	5.802	0.086	0.3342	0.005	0.1241	0.0016	0.53492	1946.7	12.8	1858.7	24.2	2015.2	22.9	580	54	144	17	127	13	0.25	92.2	1946.5	13
C718_02R*	6.005	0.096	0.3404	0.0046	0.1255	0.0018	0.35531	1976.6	13.9	1888.6	22.1	2035.1	25.4	486	48	95.7	9.7	92.3	7.7	0.20	92.8	1959.5	13.7
C718_03C*	5.62	0.13	0.3268	0.0061	0.1225	0.0023	0.62488	1919.2	19.9	1822.9	29.6	1992.2	33.4	801	42	182.6	8.7	147.2	6.3	0.23	91.5	1912.6	20.6
C718_03R*	5.17	0.17	0.3064	0.0087	0.1203	0.0031	0.68043	1847.7	28	1723	42.9	1959.9	46	1070	26	203.3	8.2	155.1	8.2	0.19	87.9	1850.4	29.1
C718_04C*	6.099	0.082	0.3468	0.0045	0.1249	0.0015	0.45837	1990.1	11.7	1919.3	21.5	2026.6	21.3	343	12	104.2	3.3	99.2	2.6	0.30	94.7	1985.5	11.8
C718_04R*	6.263	0.092	0.3546	0.0051	0.1257	0.0015	0.49127	2013.3	12.9	1956.5	24.3	2037.9	21.1	311.6	8.1	82.8	2.1	83.1	2.3	0.27	96.0	2011.5	13
C718_05C*	5.99	0.09	0.343	0.0046	0.1239	0.0016	0.51823	1974.4	13.1	1901.1	22.1	2012.3	22.9	312	10	93.8	1.9	90.2	2.2	0.30	94.5	1969.5	13.3
C718_05R*	5.056	0.067	0.2912	0.0036	0.1231	0.0014	0.46035	1828.8	11.2	1647.5	18	2000.8	20.2	275	13	90.4	4	78	2.5	0.33	82.3	1800.9	11.7
C718_06C*	5.967	0.085	0.3403	0.0045	0.1245	0.0018	0.29733	1971	12.4	1888.1	21.6	2020.9	25.6	195.7	6.3	56.6	4	54.8	3.2	0.29	93.4	1957.1	12.2
C718_06R*	5.044	0.073	0.2947	0.0041	0.1214	0.0021	0.10425	1826.7	12.3	1665	20.4	1976.1	30.8	359	44	65.1	7.8	53.9	6.3	0.18	84.3	1784.4	11.5
C718_07C*	5.802	0.067	0.3303	0.0041	0.1243	0.0013	0.4912	1946.7	10	1839.8	19.9	2018.1	18.5	392	10	22.6	3.3	24.9	3.3	0.06	91.2	1945.2	10.2
C718_07R*	5.007	0.085	0.2985	0.005	0.1192	0.0012	0.78268	1820.5	14.4	1683.9	24.8	1943.5	18	687	30	89.8	4.8	77.6	4	0.13	86.6	1858.8	13.6
C718_08C*	4.515	0.088	0.263	0.0043	0.122	0.0016	0.74324	1733.7	16.2	1505.2	21.9	1984.9	23.3	415	15	94.1	5.6	61.6	3.1	0.23	75.8	1722.7	18.9
C718_08R*	4.884	0.064	0.2899	0.0045	0.12	0.0012	0.68692	1799.5	11	1641	22.5	1955.4	17.9	855	33	164	11	109.6	3.7	0.19	83.9	1826.3	10.7
C718_09C*	6.076	0.09	0.3493	0.0046	0.1238	0.0018	0.32965	1986.8	12.9	1931.3	22	2010.9	25.8	178.4	5.5	57.9	1.8	53.7	1.6	0.32	96.0	1977.7	12.6
C718_09R*	5.852	0.065	0.3417	0.004	0.1221	0.0012	0.43618	1954.15	9.63	1894.8	19.2	1986.3	17.5	734	43	126.2	8	118.1	6.4	0.17	95.4	1951.55	9.7
C718_10C*	16.6	4	0.78	0.11	0.155	0.023	0.68653	2912	231	3717	398	2401	252	2.86	0.98	0.074	0.028	1.44	0.36	0.03	154.8	2804	214
C718_11C*	6.178	0.076	0.3567	0.0043	0.1234	0.0014	0.37705	2001.3	10.8	1966.5	20.4	2005.2	20.1	296	21	74	5.5	74.5	4.6	0.25	98.1	1998.1	10.7
C718_11R*	5.684	0.069	0.3282	0.0044	0.1239	0.0012	0.59076	1928.9	10.5	1829.7	21.4	2012.3	17.2	689	25	119.6	5.1	114.5	4.1	0.17	90.9	1936	10.5
C718_12C*	5.542	0.065	0.3235	0.004	0.1229	0.0013	0.40871	1907.1	10.1	1806.8	19.5	1997.9	18.8	497	11	55.8	3.6	48.7	2.8	0.11	90.4	1899.7	10.2
C718_12R	6.29	0.12	0.3613	0.0058	0.1266	0.0023	0.35147	2017.1	16.7	1988.3	27.5	2050.5	32.1	171	25	18.8	1.7	16.7	1.5	0.11	97.0	2012.2	16.2
C718_13C	6.256	0.092	0.3678	0.0053	0.1232	0.0016	0.51699	2012.3	12.9	2019	25	2002.3	23.1	424	36	141	14	127	12	0.33	100.8	2012.3	12.9
C718_13R	6.25	0.12	0.3652	0.0064	0.1246	0.0021	0.49625	2011.5	16.8	2006.8	30.2	2022.3	29.9	477.2	7.8	167.1	6.5	133.7	5.5	0.35	99.2	2011.3	16.8
C718_14C*	5.829	0.092	0.3452	0.0049	0.1227	0.0018	0.41915	1950.7	13.7	1911.6	23.5	1995.1	26.1	157.2	5.8	68	2.4	62.6	1.8	0.43	95.8	1946.2	13.6
C718_14R	6.188	0.099	0.3653	0.0066	0.1229	0.0015	0.69501	2002.8	14	2007.2	31.2	1997.9	21.7	296	10	71.7	2.6	66	2.3	0.24	100.5	2001.9	13.2
C718_15C	6.541	0.09	0.3722	0.005	0.128	0.0017	0.36469	2051.4	12.1	2039.7	23.5	2069.9	23.4	605	19	302	14	276	11	0.50	98.5	2050.4	12
C718_15R*	5.141	0.079	0.3077	0.005	0.1222	0.0016	0.68045	1842.9	13.1	1729.4	24.6	1987.8	23.3	564	33	159	11	113.4	8.3	0.28	87.0	1858.9	12.9
C718_16C*	5.865	0.064	0.3441	0.0045	0.1242	0.0014	0.42194	1956.07	9.47	1906.4	21.6	2016.6	20	466	23	81.1	7.1	63.3	5.2	0.17	94.5	1955.53	9.52
C718_17C	6.23	0.13	0.3622	0.0064	0.1255	0.0029	0.24287	2008.7	18.3	1992.6	30.3	2035.1	40.9	230.1	9.2	69.7	2.9	61.8	2.8	0.30	97.9	2005.4	17.2
C718_17R	6.29	0.13	0.365	0.0057	0.1249	0.0021	0.49665	2017.1	18.1	2005.8	26.9	2026.6	29.8	367.6	6.7	149.7	2.4	123.6	2.9	0.41	99.0	2015.3	17.8
C718_18C*	5.98	0.085	0.349	0.0051	0.1249	0.0017	0.45742	1972.9	12.4	1929.8	24.4	2026.6	24.1	260	10	90	5.2	74	3.9	0.35	95.2	1971.4	12.4
C718_18R*	5.78	0.11	0.3387	0.0055	0.1241	0.0021	0.48596	1943.4	16.5	1880.4	26.5	2015.2	30	298.2	3.8	74.1	2.8	58.1	2.2	0.25	93.3	1936.1	16.6
C718_19C	6.18	0.13	0.3644	0.0064	0.1232	0.002	0.59294	2001.6	18.4	2003	30.2	2002.3	28.8	228	5.3	95.8	3	88	2.7	0.42	100.0	2001.6	18.4
C718_19R*	5.91	0.17	0.3416	0.0076	0.1258	0.0029	0.63771	1962.7	25	1894.4	36.5	2039.3	40.8	289	11	93.6	4.9	78.6	3.9	0.32	92.9	1958.3	25.6
C718_20C*	5.056	0.095	0.3	0.005	0.1223	0.0017	0.65144	1828.8	15.9	1691.3	24.8	1989.2	24.7	370	37	74.8	5.7	60.5	4.1	0.20	85.0	1827.9	16.7
C718_20R	6.25	0.14	0.3651	0.0087	0.124	0.0021	0.66488	2011.5	19.6	2006.3	41.1	2013.8	30	420	12	108.9	4.1	95.9	3.5	0.26	99.6	2012.3	19
C718_21C*	5.43	0.18	0.3179	0.0088	0.1225	0.0032	0.6097	1889.6	28.4	1779.5	43	1992.2	46.4	144	28	16.9	3.9	17.4	3.5	0.12	89.3	1881.9	29.5
C718_21R*	3.5	0.16	0.2217	0.0067	0.1146	0.0045	0.51108	1527.2	36.1	1290.9	35.4	1872.8	70.8	128	18	12.4	2	11.1	2	0.10	68.9	1369.1	35.5
C718_22C	6.97	0.23	0.385	0.011	0.1317	0.0037	0.56603	2107.6	29.3	2099.6	51.2	2120	49.2	405	20	95.6	6	95.8	4.6	0.24	99.0	2107.6	29.3
C718_22R	6.95	0.14	0.382	0.0064	0.1318	0.0022	0.54223	2105.1	17.9	2085.6	29.9	2121.3	29.2	394	14	100.9	7.8	91.8	5.7	0.26	98.3	2104.1	17.9
C718_23C*	5.89	0.12	0.3356	0.0061	0.1281	0.0025	0.48151	1959.8	17.7	1865.5	29.4	2071.3	34.4	101	10	38.6	3.9	36.1	3.7	0.38	90.1	1950.1	18
C718_23R	6.214	0.083	0.3646	0.0049	0.1238	0.0014	0.52989	2006.4	11.7	2003.9	23.1	2010.9	20.1	238	14	75.6	4.4	76	4	0.32	99.7	2006.5	11.7
C718_24C*	5.72	0.15	0.3366	0.0074	0.1234	0.0025	0.73108	1934.4	22.7	1870.3	35.7	2005.2	36	715	22	157.2	4.3	153.1	6.2	0.22	93.3	1942.5	22.8
C718_24R*	4.93	0.049	0.2944	0.0035	0.1218	0.00096	0.52465	1807.41	8.39	1663.5	17.4	1982	14	1117	92	172	16	129	12	0.15	83.9	1810.66	8.53
C718_25C*	5.144	0.083	0.3017	0.0045	0.1242	0.0016	0.55503	1843.4	13.7	1699.7	22.3	2016.6	22.8	190	15	24.4	1.5	22.4	1.3	0.13	84.3	1833.1	14.3
C718_25R*	5.279	0.078	0.3179	0.0049	0.1214	0.0012	0.7508	1865.5	12.6	1779.5	24	1976.1	17.6	903	34	174.9	9	143.6	7.6	0.19	90.1	1886.5	11.9
C718_26C	6.239	0.089	0.3643	0.005	0.1249	0.0017	0.36515	2009.9	12.5	2002.5	23.6	2026.6	24.1	191.8	8.9	57.6	3.1	55.7	2.6	0.30	98.8	2009.2	12.3
C718_26R*	5.318	0.097	0.3173	0.0052	0.123	0.0019	0.58425	1871.8	15.6	1776.5	25.4	1999.4	27.4	312	17	85.5	5.2	69.8	4.3	0.27	88.9	1868.3	16
C718_27C*	5.42	0.17	0.3233	0.0077	0.1233	0.0024	0.67205	1888	26.9	1805.8	37.5	2003.7	34.6	685	16	343	10	277.6	6.6	0.50	90.1	1881.8	27.9
C718_27R	6.267	0.086	0.3662	0.005	0.1254	0.0017	0.38418	2013.9	12	2011.5	23.6	2033.7	24	160.6	6.2	56.1	1.8	55.7	1.6	0.35	98.9	2013.7	11.9
C718_28C*	5.826	0.096	0.3393	0.005	0.1248	0.0015	0.63099	1950.3	14.3	1883.3	24.1	2025.2	21.3	297	24	61.3	2.8	66.7	3.5	0.21	93.0	1952.4	14.5
C718_28R*	6.07	0.11	0.3481	0.0051	0.1277	0.0024	0.2515	1985.9	15.8	1925.5	24.4	2065.8	33.1	228	18	63.7	5	62.3	4.3	0.28	93.2	1971.2	14.9
C718_29C	6.27	0.12	0.3665	0.0073	0.1249	0.0021	0.5597	2014.3	16.8	2012.9	34.4	2026.6	29.8	337	10	74.9	1.7	76.4	2.1	0.22	99.3	2014.3	16.7
C718_29R*	5.961	0.084	0.3445	0.0046	0.1266	0.0017	0.35509	1970.2	12.3	1908.3	22.1	2050.5	23.7	318	11	73.1	2.7	73.7	3	0.23	93.1	1962.3	12.2
C718_30C	6.278	0.091	0.3676	0.0049	0.1246	0.0016	0.48903	2015.4	12.7	2018.1	23.1	2022.3	22.8	237.4	7.1	77.3	3.3	80	3	0.33	99.8	2015.5	12.7
C718_30R*	4.817	0.045	0.2946	0.0038	0.1195	0.001	0.58639	1787.87	7.85	1664.5	18.9	1948	15	1452	32	279.9	6	208.5	3.6	0.19	85.4	1800.47	7.69
C718_31C*	6.036	0.062	0.3525	0.0047	0.12433	0.00096	0.70411	1981.05	8.95	1946.5	22.4	2018.5	13.7	705	23	206	25	250	28	0.29	96.4	1988.09	8.19
C718_31R*	4.091	0.057	0.2552	0.0039	0.1174	0.0015	0.51465	1652.5	11.4	1465.2	20	1916.2	22.9	1047	33	127.6	3.6	121.9	4	0.12	76.5	1641.5	11.9
C718_32C*	5.825	0.07	0.3406	0.0043	0.1249	0.0013	0.50421	1950.1	10.4	1889.6	20.7	2026.6	18.4	354	16	130.4	8.2	124.7	6.6	0.37	93.2	1950	10.5
C718_32R*	5.266	0.065	0.3157	0.0041	0.1219	0.0012	0.62885	1863.4	10.5	1768.7	20.1	1983.4	17.5	432	15	125.5	3.7	109.4	3.1	0.29	89.2	1871.5	10.5
C=analysis of grain core; R=analysis from grain rim; * denotes analyses that failed 2? concordance test
